# Supplementary material for: A novel phage display based platform for exosome diversity characterization
Source: Royal Society of Chemistry journal article supplement (doi:10.1039/d1nr06804k), 2022-01-01
Supplement: d1nr06804k2.pdf [file d1nr06804k2.pdf]

## Supplementary information

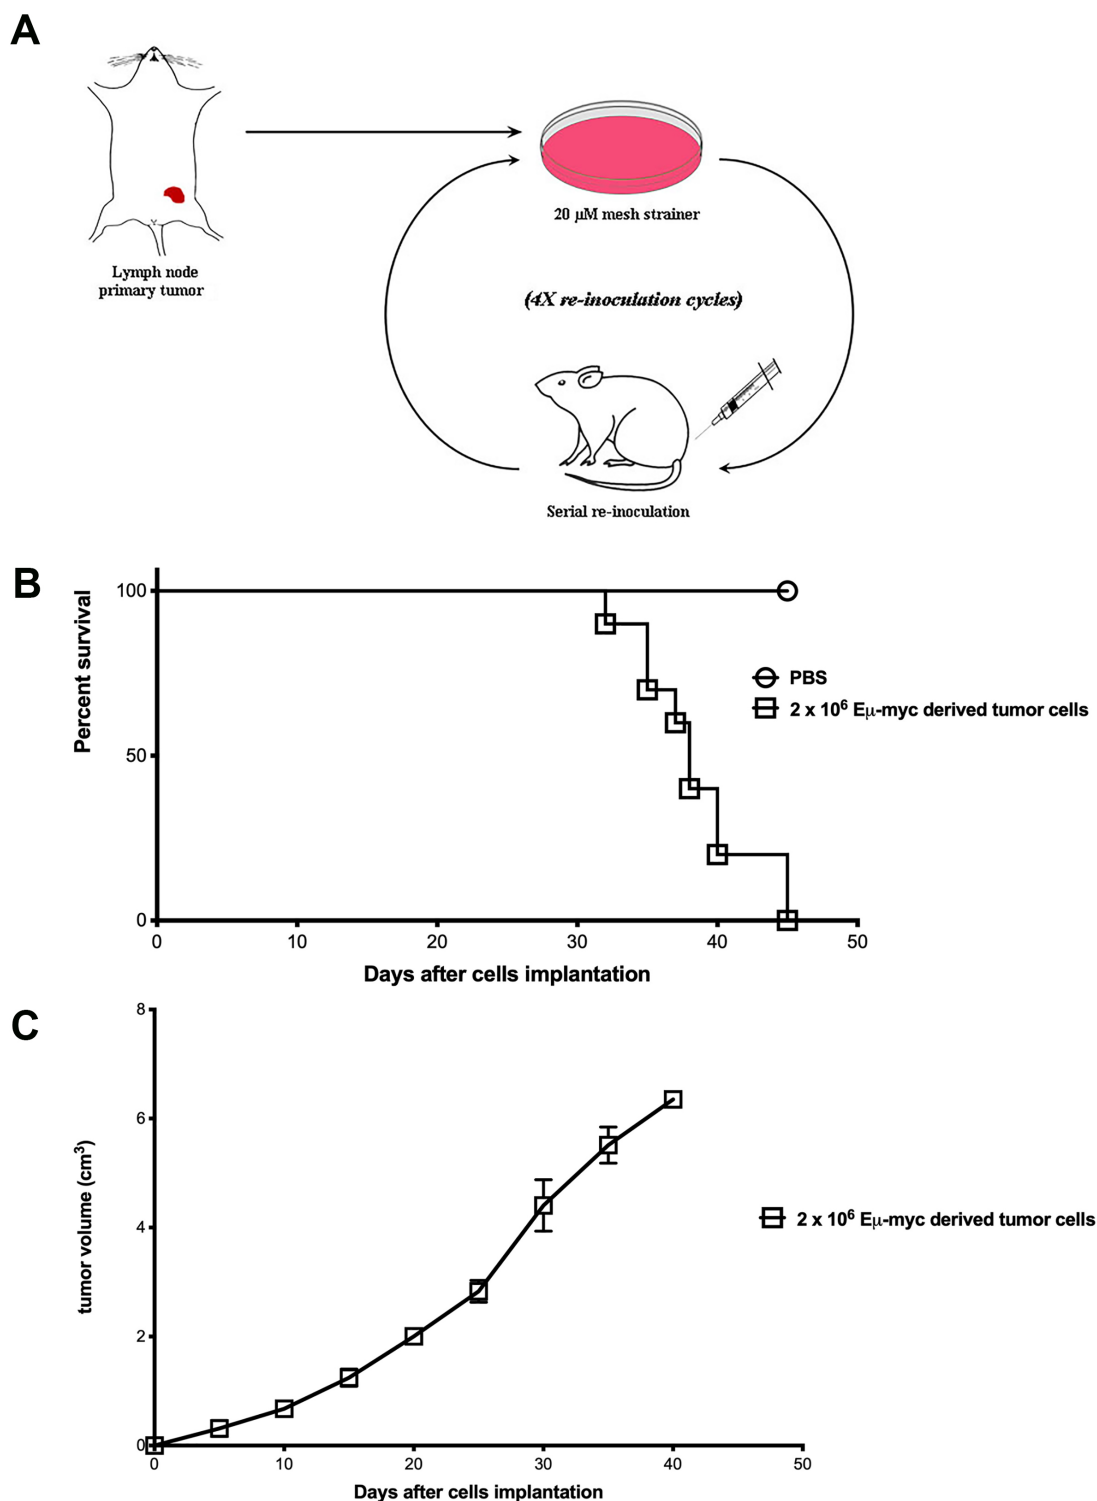

**Supplementary Figure 1. Development of an E $\mu$ -mc derived xenograft.** (A) Workflow of the xenograft establishment protocol. Cancer cells from the lymph nodes of E $\mu$ -myc tumor-bearing were isolated and after four cycles of reinoculation a E $\mu$ -myc-derived cell line was established. (B) Survival rate of the E $\mu$ -myc-derived cell line. (C) Tumor growth of the E $\mu$ -myc-derived cell line.

| Phages Clone | A.A. sequence | Frequency  |
|--------------|---------------|------------|
| Φ 8          | CNAGHLSQC     | 35% (7/20) |
| Φ 2          | CNVERDKEC     | 20% (4/20) |
| Φ 3          | CSAYDRPLC     | 15% (3/20) |
| Φ 4          | CTTQMGIVC     | 15% (3/20) |
| Φ 6          | CLQGS GHIC    | 15% (3/20) |

**Supplementary Table 1. Phage ligands isolated from phage-display library.** Recombinant peptide inserts sequences. Percentage of independent clones isolated at the end of the three in vivo biopanning cycles.

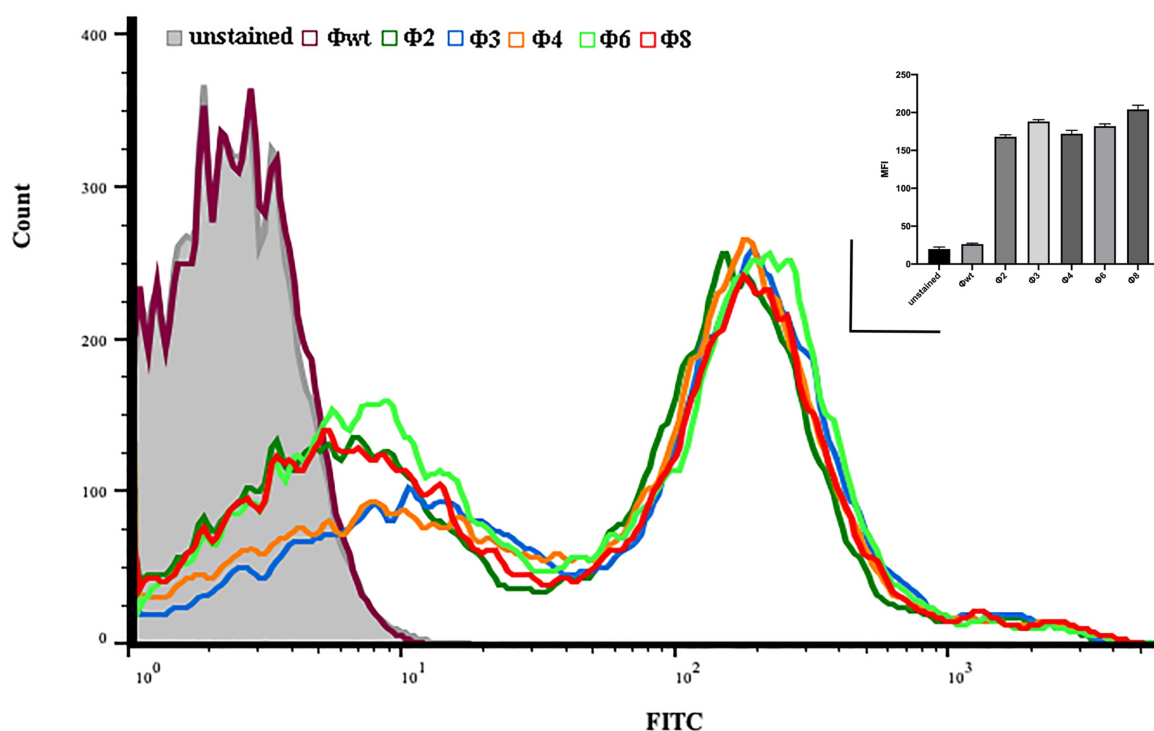

**Supplementary figure 2. Ex vivo binding validation of the FITC- conjugated phages to Eμ-myc-derived tumor cells by flow cytometry.** Selected phages (Φ2, Φ3, Φ4, Φ6, Φ8) and wild type phage (Φwt) were conjugated with fluorescein isothiocyanate (FITC) as fluorophore. Eμ-myc-derived tumor cells were stained with single phages and then analyzed by BD FACSCanto II Flow Cytometer. Cells were gated in FSC-A vs SSC-A. Stringent gating strategies to exclude debris or dead cells that exhibit autofluorescence were applied. Mean fluorescence intensity (MFI) was evaluated using FlowJo software and represented as histogram including ten independent replicates.
